# Supplementary material for: Combating subclonal evolution of resistant cancer phenotypes
Source: PubMed Central journal article supplement (PMC5666005; doi:10.1038/s41467-017-01174-3), 2017-11-01
Supplement: 41467_2017_1174_MOESM3_ESM.pdf [file 41467_2017_1174_MOESM3_ESM.pdf]

## **Description of Additional Supplementary Files**

File Name: Supplementary Data 1

Description: Clinical history of breast cancer patient #1

File Name: Supplementary Data 2

Description: Clinical history of breast cancer patient #2

File Name: Supplementary Data 3

Description: Clinical history of breast cancer patient #3

File Name: Supplementary Data 4

Description: Clinical history of breast cancer patient #4
